# Supplementary material for: Highly tough and rapid self-healing dual-physical crosslinking poly(DMAA-co-AM) hydrogel
Source: Royal Society of Chemistry journal article supplement (doi:10.1039/d1ra05896g), 2021-01-01
Supplement: d1ra05896g1.pdf [file d1ra05896g1.pdf]

## Supporting Information

### Highly tough and rapid self-healing dual-physical crosslinking poly(DMAA-*co*-AM) hydrogel

Yinlei Lin<sup>\*a,b</sup>, Shuoqi Wang<sup>a</sup>, Sheng Sun<sup>a</sup>, Yaoheng Liang<sup>a</sup>, Yisheng Xu<sup>a</sup>, Huawen Hu<sup>\*a,b</sup>, Jie Luo<sup>a</sup>, Haichen Zhang<sup>\*a</sup> and Guangji Li<sup>c,d</sup>

---

<sup>a</sup> School of Materials Science and Hydrogen Energy, Foshan University, Foshan, Guangdong 528000, P. R. China.

<sup>b</sup> Guangdong Key Laboratory for Hydrogen Energy Technologies, Foshan, 528000, P. R. China.

<sup>c</sup> School of Materials Science and Engineering, South China University of Technology, Guangzhou 510640, P. R. China.

<sup>d</sup> Key Lab of Guangdong Province for High Property and Functional Polymer Materials, South China University of Technology Guangzhou 510640, P. R. China.

\*Corresponding authors: Yinlei Lin, Huawen Hu, Haichen Zhang

E-mail addresses: linyinlei@fosu.edu.cn (Y. Lin), huawenhu@126.com (H. Hu), hc Zhang@fosu.edu.cn (H. Zhang)

### Characterizations

$^1\text{H}$  NMR spectra were measured at ambient temperature on a Bruker Avance III 400 spectrometer (400 MHz). 10 mg samples dissolved in 1 mL of  $d_6$ -DMSO at 80 °C.

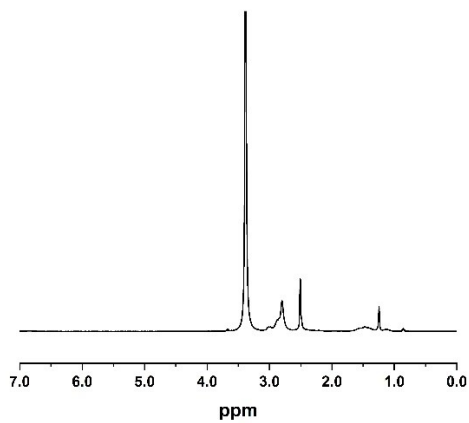

**Figure S1**  $^1\text{H}$  NMR spectrum of 0.15DPNC hydrogel.

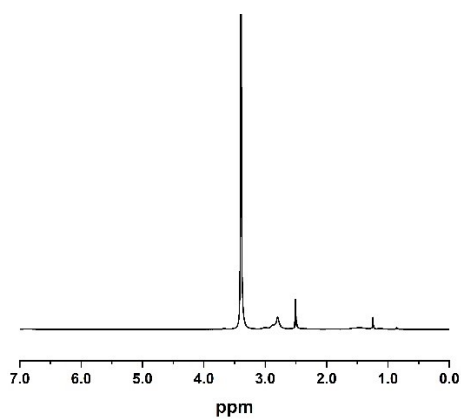

**Figure S2**  $^1\text{H}$  NMR spectrum of 0.2DPNC hydrogel.

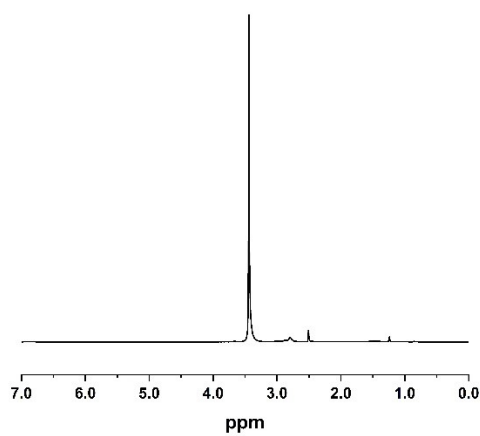

**Figure S3**  $^1\text{H}$  NMR spectrum of 0.3DPNC hydrogel.
